# Supplementary material
Source: MDPI journal article supplement (https://www.mdpi.com/2227-9040/8/4/133)
Supplement: s1 [file s1]

# Paracetamol Sensing with a Pencil Lead Electrode Modified with Carbon Nanotubes and Polyvinylpyrrolidone

Piyanut Pinyou <sup>1,\*</sup>, Vincent Blay <sup>2</sup>, Kantapat Chansaenpak <sup>3</sup> and Sireerat Lisnund <sup>4,\*</sup>

<sup>1</sup> School of Chemistry, Institute of Science, Suranaree University of Technology, 111 University Avenue, Suranaree, Muang, Nakhon Ratchasima 30000, Thailand

<sup>2</sup> Division of Biomaterials and Bioengineering, University of California San Francisco, 513 Parnassus Ave, San Francisco, CA 94143, USA; vincent.blayroger@ucsf.edu

<sup>3</sup> National Nanotechnology Center, National Science and Technology Development Agency, Thailand Science Park, Pathum Thani 12120, Thailand; kantapat.cha@nanotec.or.th

<sup>4</sup> Department of Applied Chemistry, Faculty of Science and Liberal Arts, Rajamangala University of Technology Isan, 744, Suranarai Rd., Nakhon Ratchasima 30000, Thailand

\* Correspondence: piyanutp@sut.ac.th (P.P.); sireerat.in@rmuti.ac.th (S.L.)

Received: 12 November 2020; Accepted: 11 December 2020; Published: date

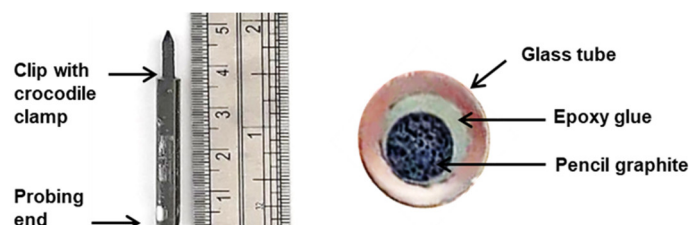

**Figure S1.** Home-made PGE design as seen from the side (left) and zoom-in on the probing end as seen from the bottom (right).

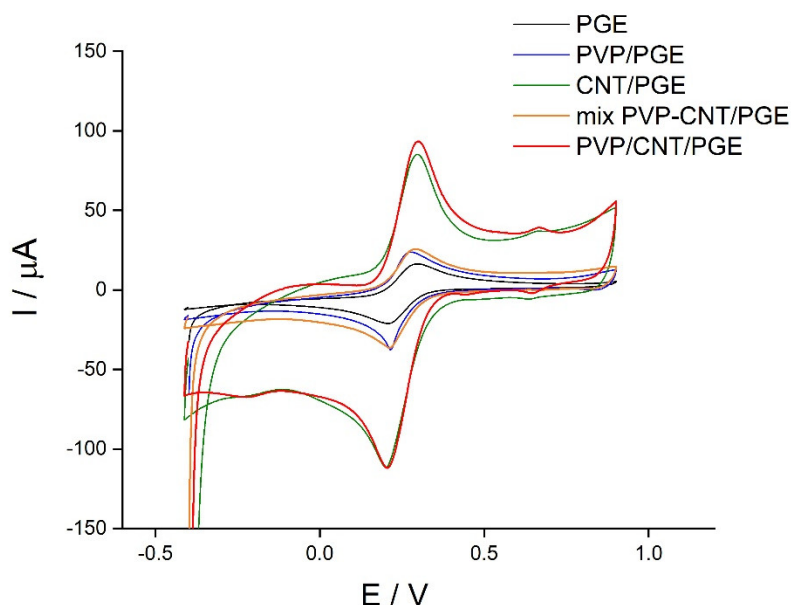

**Figure S2.** Cyclic voltammograms of 5 mM  $K_3[Fe(CN)_6]$  containing 0.1 M KCl, scan rate 50 mV/s for the investigation of electroactive surface of the electrodes with different modification.

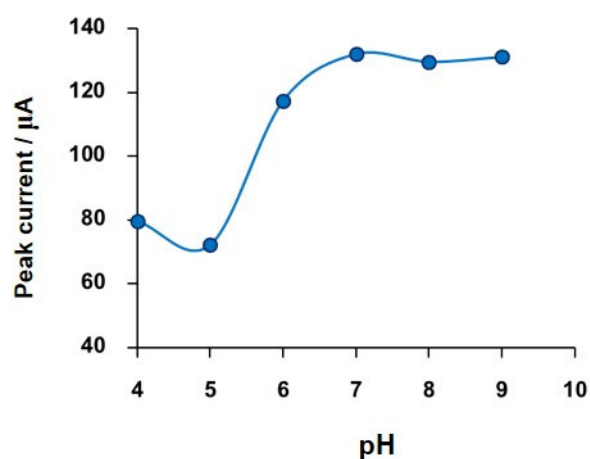

**Figure S3.** The plot of the pH of the peak current vs. pH.

**Publisher's Note:** MDPI stays neutral with regard to jurisdictional claims in published maps and institutional affiliations.

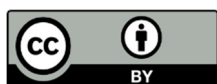

© 2020 by the authors. Licensee MDPI, Basel, Switzerland. This article is an open access article distributed under the terms and conditions of the Creative Commons Attribution (CC BY) license (<http://creativecommons.org/licenses/by/4.0/>).
